# Supplementary material for: Quasiperiodic rhythms of the inferior olive
Source: PubMed Central journal article supplement (PMC6538185; doi:10.1371/journal.pcbi.1006475), 2019-05-06
Supplement: pcbi.1006475.s001.pdf [file pcbi.1006475.s001.pdf]

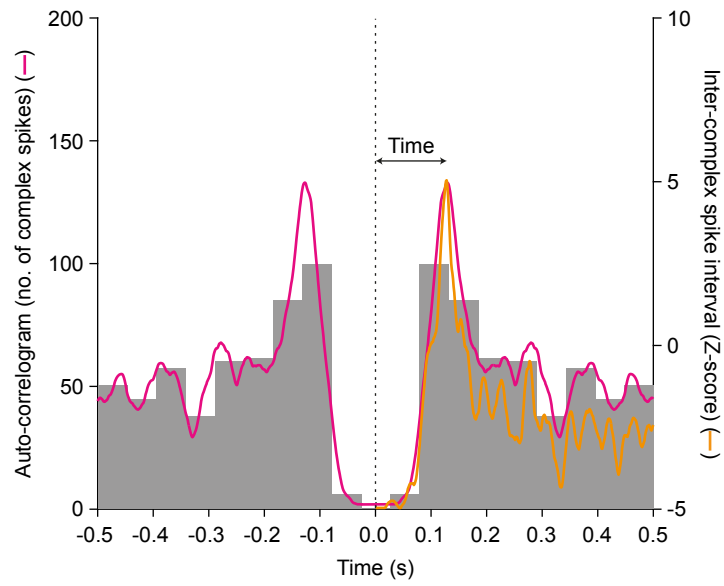

**Fig. S1 | Comparison of autocorrelogram with inter-complex spike interval histogram.**

The autocorrelogram of the same Purkinje cell as shown in Fig. 2A (10 ms bins) convolved with a 5 ms kernel (red curve) compared to the convolved inter-complex spike interval (ICSI) histogram (orange curve). The auto-correlogram includes also intervals between non-consecutive complex spikes. Consequently, on a short time scale, both auto-correlogram and ICSI histogram are identical, but they diverge at longer time scales.
