# Supplementary material for: Quasiperiodic rhythms of the inferior olive
Source: PubMed Central journal article supplement (PMC6538185; doi:10.1371/journal.pcbi.1006475), 2019-05-06
Supplement: pcbi.1006475.s007.pdf [file pcbi.1006475.s007.pdf]

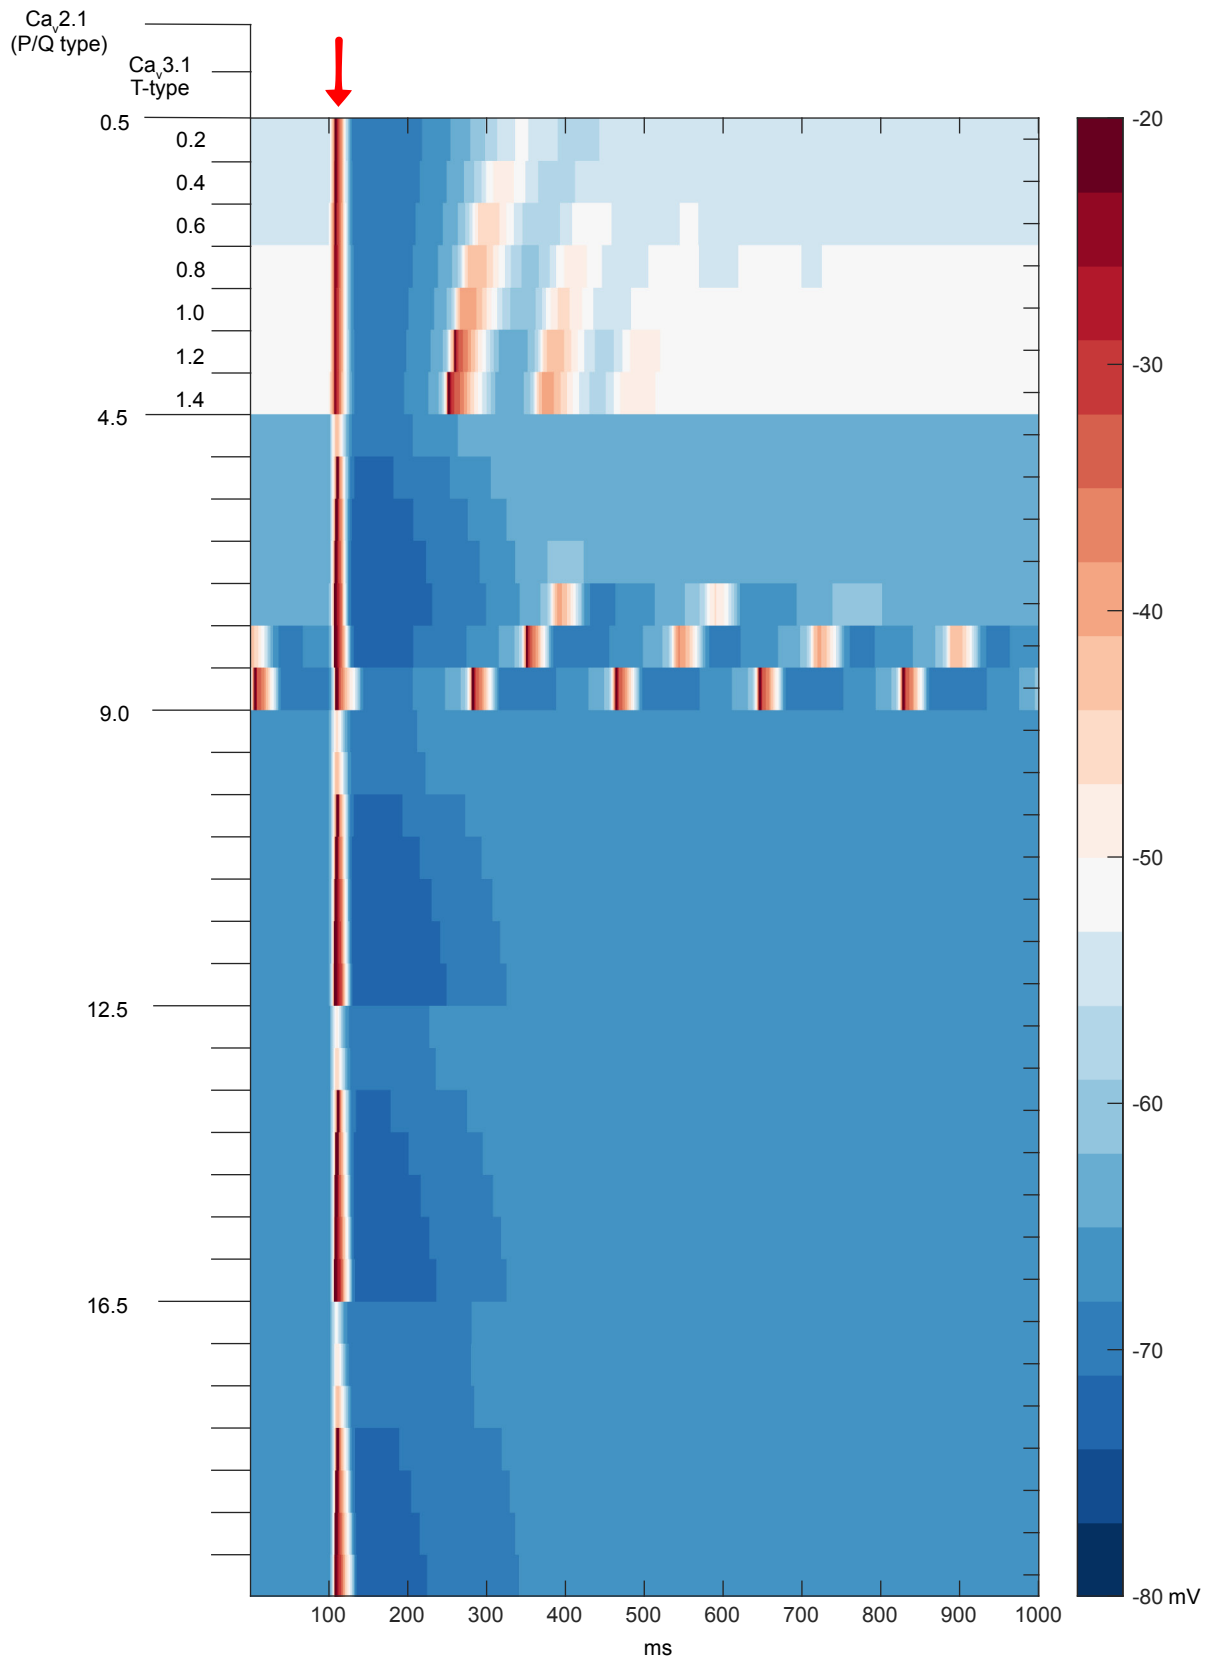

**Fig. S7 | Rebound firing occurs only in a small region of parameter space.** The post-spiking behavior of model neurons after a depolarization was examined for a grid of parameters, within known experimental values. A depolarizing current pulse triggers spikes at 100 ms. The rebound behavior is dependent on a complex interplay between a number of parameters, but most importantly, it

exists in a rather narrow range of the parameter space between T- and P/Q-type  $\text{Ca}^{2+}$  channels. For very low levels of  $\text{Ca}_v3.1$  (T-type) expression, the model cell settles on an unphysiologically saturated depolarization after spiking. The cells in our model have  $\text{Ca}_v2.1$  (P/Q-type) expression around 4.5 and  $\text{Ca}_v3.1$  between 0.6 and 1.1.
